# Supplementary material for: Molecular-Based Taxonomic Inferences of Some Spider Mite Species of the Genus Oligonychus Berlese (Acari, Prostigmata, Tetranychidae)
Source: MDPI journal article supplement (doi:10.3390/insects14020192), 2023-02-15
Supplement: s1 [file s1]

# **Molecular-Based Taxonomic Inference of Some Spider Mite Species of the Genus *Oligonychus* Berlese (Acari, Prostigmata, Tetranychidae)**

**Hafiz Muhammad Saqib Mushtaq <sup>1</sup>, Amgad A. Saleh <sup>2</sup>, Muhammad Kamran <sup>1</sup>, Fahad Jaber Alatawi <sup>1,\*</sup>**

<sup>1</sup> Acarology Research Laboratory, Department of Plant Protection, College of Food and Agriculture Sciences, King Saud University, P.O. Box No. 2460, Riyadh 11451, Saudi Arabia

<sup>2</sup> Plant Pathology Laboratory, Department of Plant Protection, College of Food and Agriculture Sciences, King Saud University, P.O. Box No. 2460, Riyadh 11451, Saudi Arabia

\* Correspondence: [falatawi@ksu.edu.sa](mailto:falatawi@ksu.edu.sa)

Number of supplementary tables: 7

**Table S1.** Geographical distribution, host plant, collection details, and ITS2/COI fragment size of all spider mite samples of seven *Oligonychus* species viz. *O. afrasiaticus*, *O. coniferarum*, *O. dactyloni*, *O. punicae*, *O. pratensis*, *O. tylus*, and *O. washingtoniae*, collected from Pakistan, Saudi Arabia, USA, & Yamen, and analyzed in the present study.

| Sample voucher no. (SVN) | Species                 | Collection date | Locality, Province, Country                   | Host Plant                                                  | Collector name (Reference)         | GPS                        | GenBank accession numbers |          | ITS2 Fragment Size (bp) | COI Fragment Size (bp) |
|--------------------------|-------------------------|-----------------|-----------------------------------------------|-------------------------------------------------------------|------------------------------------|----------------------------|---------------------------|----------|-------------------------|------------------------|
|                          |                         |                 |                                               |                                                             |                                    |                            | ITS2                      | COI      |                         |                        |
| 2                        | <i>O. washingtoniae</i> | 02 Jun 2018     | Diriyah, Riyadh, Saudi Arabia                 | <i>Washingtonia filifera</i> (Lindl.) H. Wendl. (Arecaceae) | HMS Mushtaq                        | 24°44'48.7"N, 46°31'37.0"E | OQ185439                  | OQ180838 | 483                     | 410                    |
| 3                        | <i>O. dactyloni</i>     | 19 May 2018     | Haylat Radi al Baham, Madinah, Saudi Arabia   | Grasses (Poaceae)                                           | HMS Mushtaq, JH Mirza & M Kamran   | 24°05'19.3"N 39°40'06.9"E  | OQ185449                  | OQ180840 | 405                     | 410                    |
| 4*                       | <i>O. afrasiaticus</i>  | 07 Aug 2018     | KSU, Riyadh, Saudi Arabia                     | Grasses                                                     | HMS Mushtaq                        | 24°42'59.2"N 46°36'42.8"E  | OQ185402                  | N/A      | 517                     | N/A                    |
| 7*                       | <i>O. afrasiaticus</i>  | 08 May 2018     | Hariq, Riyadh, Saudi Arabia                   | <i>Phoenix dactylifera</i> L. (Arecaceae)                   | HMS Mushtaq, JS Basahih & M Kamran | 23°37'50.6"N 46°31'56.5"E  | OQ185404                  | N/A      | 517                     | N/A                    |
| 9                        | <i>O. coniferarum</i>   | 13 Apr 2018     | Taif, Makkah, Saudi Arabia                    | <i>Thuja</i> sp. (Cupressaceae)                             | HMS Mushtaq                        | 21°17'23.5"N 40°23'18.5"E  | OQ185386                  | N/A      | 460                     | N/A                    |
| 11*                      | <i>O. dactyloni</i>     | 08 May 2018     | Howtat Bani Tamim, Riyadh, Saudi Arabia       | Grasses                                                     | HMS Mushtaq, JS Basahih & M Kamran | 23°15'50.3"N 46°43'18.6"E  | N/A                       | OQ180841 | N/A                     | 410                    |
| 16*                      | <i>O. tylus</i>         | 12 May 2018     | Kharabah, Jizan, Saudi Arabia                 | Grasses                                                     | HMS Mushtaq, JS Basahih & M Kamran | 16°44'51.8"N 42°55'33.8"E  | OQ185437                  | N/A      | 515                     | N/A                    |
| 18*                      | <i>O. coniferarum</i>   | 24 May 2018     | JADCO, Jouf, Saudi Arabia                     | <i>Thuja</i> sp.                                            | HMS Mushtaq, JH Mirza & M Kamran   | 29°48'44.5"N 38°23'22.6"E  | OQ185387                  | N/A      | 483                     | N/A                    |
| 22*                      | <i>O. coniferarum</i>   | 23 May 2018     | Cultivated Area, Tabuk, Saudi Arabia          | <i>Thuja</i> sp.                                            | HMS Mushtaq, JH Mirza & M Kamran   | 28°25'22.7"N 36°36'02.7"E  | OQ185388                  | N/A      | 482                     | N/A                    |
| 33*                      | <i>O. afrasiaticus</i>  | 21 Apr 2018     | Qatif, Eastern Province, Saudi Arabia         | <i>Sorghum halepense</i> (L.) Pers. (Poaceae)               | JS Basahih, JH Mirza & M Kamran    | 27°35'16.1"N 47°43'30.3"E  | OQ185412                  | N/A      | 520                     | N/A                    |
| 34                       | <i>O. afrasiaticus</i>  | 20 Apr 2018     | Qaryat AlUlya, Eastern Province, Saudi Arabia | Grasses                                                     | JS Basahih, JH Mirza & M Kamran    | 27°35'16.1"N 47°43'30.3"E  | OQ185423                  | N/A      | 492                     | N/A                    |
| 39* <sup>1</sup>         | <i>O. afrasiaticus</i>  | 24 Apr 2013     | Allaghamess, Baha, Saudi Arabia               | Grasses                                                     | M Kamran                           | 20°11'52.5"N 41°23'35.8"E  | OQ185405                  | N/A      | 517                     | N/A                    |
| 40                       | <i>O. pratensis</i>     | Spring (2015)   | Hadley's Date Gardens, California, USA        | <i>P. dactylifera</i>                                       | F Ganjisaffar                      | 33 38'25"N, 116 12'11"W    | OQ185450                  | OQ180839 | 530                     | 410                    |
| 45*                      | <i>O. coniferarum</i>   | 22 May 2018     | Astra farms, Tabuk, Saudi Arabia              | <i>Thuja</i> sp.                                            | HMS Mushtaq, JH Mirza & M Kamran   | 28°41'32.0"N 36°20'31.1"E  | OQ185389                  | N/A      | 483                     | N/A                    |
| 46*                      | <i>O. afrasiaticus</i>  | 11 May 2018     | Malha, Jizan, Saudi Arabia                    | <i>S. bicolor</i>                                           | HMS Mushtaq, JS Basahih & M Kamran | 17°16'02.3"N 42°34'46.9"E  | OQ185413                  | N/A      | 520                     | N/A                    |

|     |                         |               |                                              |                                                |                         |                              |          |          |     |     |
|-----|-------------------------|---------------|----------------------------------------------|------------------------------------------------|-------------------------|------------------------------|----------|----------|-----|-----|
| 49  | <i>O. afrasiaticus</i>  | N/A           | Seiyun, Hadhramout, Yemen                    | <i>P. dactylifera</i>                          | JH Basahih              | 15°54'58.5"N<br>48°46'53.0"E | OQ185414 | OQ180833 | 515 | 410 |
| 50  | <i>O. afrasiaticus</i>  | 27 May 2019   | Hisn 'Idan, Hadhramout, Yemen                | <i>P. dactylifera</i>                          | JH Basahih              | 15°20'20.8"N<br>48°46'53.0"E | OQ185415 | OQ180834 | 520 | 410 |
| 51* | <i>O. tylus</i>         | 08 Aug 2019   | BZU, Punjab, Pakistan                        | <i>Z. mays</i>                                 | N Abbas                 | 30°16'04.5"N<br>71°30'03.7"E | OQ185431 | N/A      | 539 | N/A |
| 53  | <i>O. perseae</i>       | 09 Oct 2019   | Chiautla, Estado de México, Mexico           | <i>Alnus jorulensis</i> Kunth (Betulaceae)     | MT Santillán-Galicia    | 19°32'33.1"N<br>98°52'33.1"W | OQ185403 | N/A      | 470 | N/A |
| 54  | <i>O. tylus</i>         | 01 Nov 2019   | Qunfudhah, Makkah, Saudi Arabia              | <i>Hyphaene thebaica</i> (L.) Mart.            | HMS Mushtaq, & M Kamran | 19°08'01.3"N<br>41°04'33.3"E | OQ185432 | OQ180835 | 517 | 410 |
| 57* | <i>O. coniferarum</i>   | 31 Oct 2019   | KKU, Asir, Saudi Arabia                      | <i>Arucaria</i> sp. (Cupressaceae)             | HMS Mushtaq, & M Kamran | 18°14'51.3"N<br>42°33'28.0"E | OQ185390 | N/A      | 483 | N/A |
| 58  | <i>O. coniferarum</i>   | 28 Oct 2019   | Baljuraishi, Baha, Saudi Arabia              | <i>Arucaria</i> sp.                            | HMS Mushtaq, & M Kamran | 19°55'27.9"N<br>41°33'42.5"E | OQ185391 | N/A      | 483 | N/A |
| 61  | <i>O. tylus</i>         | 29 Oct 2019   | Bashayer, Asir, Saudi Arabia                 | <i>S. bicolor</i>                              | HMS Mushtaq, & M Kamran | 19°43'26.3"N<br>41°55'30.8"E | OQ185433 | OQ180836 | 517 | 410 |
| 66* | <i>O. afrasiaticus</i>  | 22 Aug 2019   | Wan Bachran/Mianwali, Punjab, Pakistan       | <i>Pennisetum glaucum</i> (L.) R.Br. (Poaceae) | EM Khan                 | 32°24'23.1"N<br>71°43'29.6"E | OQ185428 | N/A      | 517 | N/A |
| 67  | <i>O. tylus</i>         | 22 Aug 2019   | Wan Bachran/Mianwali, Punjab, Pakistan       | <i>P. glaucum</i>                              | EM Khan                 | 32°24'23.1"N<br>71°43'29.6"E | OQ185434 | N/A      | 535 | N/A |
| 68* | <i>O. coniferarum</i>   | 28 Oct 2019   | Wadi Shora, Baha, Saudi Arabia               | <i>Thuja</i> sp.                               | HMS Mushtaq             | 19°47'36.6"N<br>41°45'45.3"E | OQ185392 | N/A      | 460 | N/A |
| 79* | <i>O. coniferarum</i>   | 28 Oct 2019   | Baljuraishi, Baha, Saudi Arabia              | <i>Thuja</i> sp.                               | HMS Mushtaq & M Kamran  | 19°50'47.0"N<br>41°35'06.2"E | OQ185393 | N/A      | 458 | N/A |
| 81* | <i>O. coniferarum</i>   | 29 Oct 2019   | Ajbah, Asir, Saudi Arabia                    | <i>Thuja</i> sp.                               | HMS Mushtaq & M Kamran  | 19°41'27.0"N<br>41°55'37.0"E | OQ185394 | N/A      | 482 | N/A |
| 82  | <i>O. afrasiaticus</i>  | 18 Oct 2019   | Khobar, Eastern Province, Saudi Arabia       | <i>W. filifera</i>                             | HMS Mushtaq & M Kamran  | 26°25'07.1"N<br>50°07'14.5"E | OQ185406 | N/A      | 517 | N/A |
| 83  | <i>O. washingtoniae</i> | 17 Oct 2019   | Uqair beach, Eastern Province, Saudi Arabia  | <i>W. filifera</i>                             | HMS Mushtaq & M Kamran  | 25°46'43.2"N<br>50°07'53.7"E | OQ185440 | N/A      | 483 | N/A |
| 84* | <i>O. washingtoniae</i> | 13 April 2019 | Uyaynah, Riyadh, Saudi Arabia                | <i>W. filifera</i>                             | HMS Mushtaq & M Kamran  | 24°53'13.9"N<br>46°19'26.5"E | OQ185441 | N/A      | 510 | N/A |
| 85  | <i>O. afrasiaticus</i>  | 18 Oct 2019   | Khobar, Eastern Province, Saudi Arabia       | <i>P. dactylifera</i>                          | HMS Mushtaq             | 26°10'47.6"N<br>50°01'07.8"E | OQ185407 | N/A      | 517 | N/A |
| 86* | <i>O. afrasiaticus</i>  | 13 April 2019 | Jubaylah, Riyadh, Saudi Arabia               | <i>W. filifera</i>                             | HMS Mushtaq             | 24°53'49.2"N<br>46°26'54.3"E | OQ185408 | N/A      | 517 | N/A |
| 87  | <i>O. washingtoniae</i> | 19 Oct 2019   | Ras Al-Khair, Eastern Province, Saudi Arabia | <i>W. filifera</i>                             | HMS Mushtaq             | 27°24'53.6"N<br>49°01'56.1"E | OQ185442 | N/A      | 510 | N/A |
| 88  | <i>O. washingtoniae</i> | 18 April 2019 | Wadi Hanifah, Riyadh, Saudi Arabia           | <i>W. filifera</i>                             | HMS Mushtaq             | 24°44'57.2"N<br>46°33'24.0"E | OQ185443 | N/A      | 510 | N/A |
| 89  | <i>O. afrasiaticus</i>  | 22 June 2019  | KSU, Riyadh, Saudi Arabia                    | <i>P. dactylifera</i>                          | HMS Mushtaq             | 24°42'59.2"N<br>46°36'42.8"E | OQ185409 | N/A      | 517 | N/A |
| 91  | <i>O. afrasiaticus</i>  | 18 Oct 2019   | Damam, Eastern Province, Saudi Arabia        | Grasses                                        | HMS Mushtaq & M Kamran  | 26°26'17.4"N<br>50°03'01.1"E | OQ185416 | OQ180828 | 520 | 410 |
| 93* | <i>O. coniferarum</i>   | 29 Oct 2019   | Bashayer, Asir, Saudi Arabia                 | <i>Pulicaria</i> sp. (Asteraceae)              | HMS Mushtaq & M Kamran  | 19°43'26.3"N<br>41°55'30.8"E | OQ185395 | N/A      | 483 | N/A |

|      |                         |             |                                           |                                              |                                          |                              |          |          |     |     |
|------|-------------------------|-------------|-------------------------------------------|----------------------------------------------|------------------------------------------|------------------------------|----------|----------|-----|-----|
| 94   | <i>O. afrasiaticus</i>  | 10 Oct 2019 | Jubail, Eastern Province, Saudi Arabia    | <i>Cynodon dactylon</i> (L.) Pers. (Poaceae) | HMS Mushtaq & M Kamran                   | 27°06'10.0"N<br>49°32'30.1"E | OQ185417 | N/A      | 520 | N/A |
| 95   | <i>O. washingtoniae</i> | 18 Oct 2019 | Damam, Eastern Province, Saudi Arabia     | <i>W. filifera</i>                           | HMS Mushtaq & M Kamran                   | 26°28'31.1"N<br>50°00'47.5"E | OQ185444 | N/A      | 510 | N/A |
| 98   | <i>O. tylus</i>         | 18 Oct 2019 | Damam, Eastern Province, Saudi Arabia     | Grasses                                      | HMS Mushtaq & M Kamran                   | 26°28'31.1"N<br>50°00'47.5"E | OQ185435 | N/A      | 539 | N/A |
| 99   | <i>O. afrasiaticus</i>  | 19 Oct 2019 | Jubail, Eastern Province, Saudi Arabia    | <i>P. dactylifera</i>                        | HMS Mushtaq & M Kamran                   | 27°08'50.1"N<br>49°20'02.4"E | OQ185420 | N/A      | 515 | N/A |
| 102* | <i>O. afrasiaticus</i>  | 19 Oct 2019 | Jubail, Eastern Province, Saudi Arabia    | Grasses                                      | HMS Mushtaq & M Kamran                   | 27°00'59.7"N<br>49°40'11.7"E | OQ185418 | OQ180829 | 519 | 410 |
| 106  | <i>O. afrasiaticus</i>  | 24 Aug 2020 | Abyar 'Ali, Madinah, Saudi Arabia         | <i>P. dactylifera</i>                        | FJ Alatawi, JH Mirza & EM Khan           | 24°24'33.6"N<br>39°32'28.8"E | OQ185410 | N/A      | 519 | N/A |
| 109* | <i>O. afrasiaticus</i>  | 25 Aug 2020 | Buwat, Madinah, Saudi Arabia              | <i>C. dactylon</i>                           | FJ Alatawi, JH Mirza & EM Khan           | 24°44'10.3"N<br>39°13'33.7"E | OQ185425 | OQ180830 | 519 | 410 |
| 110* | <i>O. afrasiaticus</i>  | 26 Aug 2020 | Yanbu Al Nakhal, Madinah, Saudi Arabia    | <i>C. dactylon</i>                           | FJ Alatawi, JH Mirza & EM Khan           | 24°20'18.2"N<br>38°25'57.8"E | OQ185429 | OQ180831 | 519 | 410 |
| 112* | <i>O. afrasiaticus</i>  | 26 Aug 2020 | Mabaruck Village, Madinah, Saudi Arabia   | Grasses                                      | FJ Alatawi, JH Mirza & EM Khan           | 24°15'37.8"N<br>38°22'15.2"E | OQ185426 | OQ180832 | 519 | 410 |
| 116* | <i>O. coniferarum</i>   | 10 Sep 2020 | Wadi Zarq, Baha, Saudi Arabia             | <i>Thuja</i> sp.                             | HMS Mushtaq, JH Mirza & HMS Ali          | 20°11'19.8"N<br>41°17'27.8"E | OQ185396 | N/A      | 483 | N/A |
| 118* | <i>O. coniferarum</i>   | 10 Sep 2020 | Raghdan Forest Park, Baha, Saudi Arabia   | <i>Thuja</i> sp.                             | HMS Mushtaq, JH Mirza & HMS Ali          | 20°01'15.5"N<br>41°26'10.3"E | OQ185397 | N/A      | 483 | N/A |
| 119* | <i>O. coniferarum</i>   | 10 Sep 2020 | Musaylah, Baha, Saudi Arabia              | <i>Thuja</i> sp.                             | HMS Mushtaq, JH Mirza & HMS Ali          | 20°10'42.4"N<br>41°17'04.7"E | OQ185398 | N/A      | 483 | N/A |
| 124* | <i>O. washingtoniae</i> | 11 Sep 2020 | Hajrah, Baha, Saudi Arabia                | <i>Washingtonia</i> sp.                      | HMS Mushtaq, JH Mirza & HMS Ali          | 20°13'49.4"N<br>41°03'32.8"E | OQ185445 | N/A      | 510 | N/A |
| 125* | <i>O. tylus</i>         | 11 Sep 2020 | Qura General Hospital, Baha, Saudi Arabia | Grasses                                      | HMS Mushtaq, JH Mirza & HMS Ali          | 20°16'17.0"N<br>41°09'03.0"E | OQ185438 | N/A      | 515 | N/A |
| 127* | <i>O. coniferarum</i>   | 11 Sep 2020 | Doos, Baha, Saudi Arabia                  | <i>Arucaria</i> sp.                          | HMS Mushtaq, JH Mirza & HMS Ali          | 20°17'06.2"N<br>41°13'29.9"E | OQ185399 | N/A      | 483 | N/A |
| 128* | <i>O. coniferarum</i>   | 11 Sep 2020 | Doos, Baha, Saudi Arabia                  | <i>Thuja</i> sp.                             | HMS Mushtaq, JH Mirza & HMS Ali          | 20°17'06.2"N<br>41°13'29.9"E | OQ185400 | N/A      | 483 | N/A |
| 129* | <i>O. afrasiaticus</i>  | 11 Sep 2020 | Bani Omran Village, Baha, Saudi Arabia    | <i>Pulicaria</i> sp.                         | HMS Mushtaq, JH Mirza & HMS Ali          | 20°18'11.0"N<br>41°10'23.1"E | OQ185427 | N/A      | 518 | N/A |
| 133* | <i>O. washingtoniae</i> | 12 Sep 2020 | Mashoqa Park, Baha, Saudi Arabia          | <i>Washingtonia</i> sp.                      | HMS Mushtaq, JH Mirza & HMS Ali          | 20°31'51.2"N<br>41°24'36.9"E | OQ185446 | N/A      | 510 | N/A |
| 143* | <i>O. tylus</i>         | 30 Sep 2020 | Muruj, Tabuk, Saudi Arabia                | Grasses                                      | HMS Mushtaq, JH Mirza & EM Khan          | 28°25'11.0"N<br>36°36'10.8"E | OQ185436 | OQ180837 | 516 | 410 |
| 144* | <i>O. punicae</i>       | 30 Sep 2020 | Tabuk, Tabuk, Saudi Arabia                | Unknown                                      | HMS Mushtaq, JH Mirza & EM Khan          | 28°23'40.3"N<br>36°45'59.8"E | N/A      | OQ180826 | N/A | 410 |
| 145* | <i>O. punicae</i>       | 01 Oct 2020 | Tayma, Tabuk, Saudi Arabia                | Unknown                                      | HMS Mushtaq, JH Mirza & EM Khan          | 27°40'31.0"N<br>38°20'35.7"E | N/A      | OQ180827 | N/A | 410 |
| 150* | <i>O. coniferarum</i>   | 09 Oct 2020 | Jabal AlQahar, Jizan, Saudi Arabia        | <i>Thuja</i> sp.                             | HMS Mushtaq, JH Mirza & EM Khan          | 17°39'13.1"N<br>42°54'16.7"E | OQ185401 | N/A      | 483 | N/A |
| 157  | <i>O. afrasiaticus</i>  | 22 Oct 2020 | Urayarah, Eastern Province, Saudi Arabia  | <i>P. dactylifera</i>                        | JH Mirza, HMS Sajid, N Elgoni & M Waleed | 25°58'54.2"N<br>48°51'02.1"E | OQ185421 | N/A      | 514 | N/A |

|      |                         |             |                                                  |                         |                                                |                              |          |     |     |     |
|------|-------------------------|-------------|--------------------------------------------------|-------------------------|------------------------------------------------|------------------------------|----------|-----|-----|-----|
| 167* | <i>O. afrasiaticus</i>  | 22 Oct 2020 | Um Alerrad,<br>Eastern Province,<br>Saudi Arabia | <i>Washingtonia</i> sp. | JH Mirza, HMS<br>Sajid, N Elgoni &<br>M Waleed | 25°51'39.5"N<br>48°56'18.9"E | OQ185422 | N/A | 514 | N/A |
| 168* | <i>O. washingtoniae</i> | 22 Oct 2020 | Urayarah, Eastern<br>Province,<br>Saudi Arabia   | <i>Washingtonia</i> sp. | JH Mirza, HMS<br>Sajid, N Elgoni &<br>M Waleed | 25°58'54.2"N<br>48°51'02.1"E | OQ185447 | N/A | 510 | N/A |
| 170  | <i>O. afrasiaticus</i>  | 31 Oct 2020 | Bir, Riyadh,<br>Saudi Arabia                     | <i>P. dactylifera</i>   | HMS Mushtaq, EM<br>Khan & N Elgoni             | 25°17'25.8"N<br>45°56'45.7"E | OQ185411 | N/A | 516 | N/A |
| 171* | <i>O. afrasiaticus</i>  | 07 Nov 2020 | Kharj, Riyadh,<br>Saudi Arabia                   | Grasses                 | HMS Mushtaq, EM<br>Khan & N Elgoni             | 24°17'33.4"N<br>47°16'42.9"E | OQ185424 | N/A | 518 | N/A |
| 173* | <i>O. afrasiaticus</i>  | 31 Oct 2020 | Hasi, Riyadh,<br>Saudi Arabia                    | Unknown                 | HMS Mushtaq, EM<br>Khan & N Elgoni             | 25°25'13.8"N<br>46°05'54.9"E | OQ185430 | N/A | 516 | N/A |
| 175* | <i>O. washingtoniae</i> | 31 Oct 2020 | Hasi, Riyadh,<br>Saudi Arabia                    | <i>Washingtonia</i> sp. | HMS Mushtaq, EM<br>Khan & N Elgoni             | 25°25'13.8"N<br>46°05'54.9"E | OQ185448 | N/A | 510 | N/A |
| 176* | <i>O. afrasiaticus</i>  | 28 Mar 2021 | Uyaynah, Madinah,<br>Saudi Arabia                | Grasses                 | HMS Mushtaq, M<br>Kamran                       | 25°54'38.3"N<br>39°01'00.0"E | OQ185419 | N/A | 519 | N/A |

\* These 42 samples did not contain male specimens and were morphologically identified till the level of the genus *Oligonychus*. However, their molecular analysis confirmed their species' identity.

<sup>1</sup> It represents the sample of *O. afrasiaticus*, containing only female/nymph specimens and previously claimed as *O. pratensis* from Saudi Arabia [1].

**Table S2.** Genetic divergence (pairwise p-distance) based on 33 ITS2 partial sequences, either obtained in the present study or retrieved from GenBank, among seven *Oligonychus* species (Acari: Prostigmata: Tetranychidae), collected/analyzed from Saudi Arabia and the USA.

| No. | <i>Oligonychus</i> species                 | 1     | 2     | 3             | 4             | 5     | 6     | 7     |
|-----|--------------------------------------------|-------|-------|---------------|---------------|-------|-------|-------|
| 1   | <i>O. punicae</i> (MZ435900, Saudi Arabia) | 0.000 |       |               |               |       |       |       |
| 2   | <i>O. coniferarum</i> *                    | 0.093 | 0.000 |               |               |       |       |       |
| 3   | <i>O. afrasiaticus</i> **                  | 0.478 | 0.488 | 0.000 – 0.012 |               |       |       |       |
| 4   | <i>O. tylus</i> ***                        | 0.463 | 0.478 | 0.168         | 0.000 – 0.008 |       |       |       |
| 5   | <i>O. washingtoniae</i> ****               | 0.478 | 0.497 | 0.193         | 0.127         | 0.000 |       |       |
| 6   | <i>O. dactyloni</i> (SVN: 3, Saudi Arabia) | 0.481 | 0.488 | 0.189         | 0.186         | 0.180 | 0.000 |       |
| 7   | <i>O. pratensis</i> (SVN: 40, USA)         | 0.472 | 0.475 | 0.152         | 0.112         | 0.137 | 0.186 | 0.000 |

\* It represents the average genetic distance value of 16 samples of *O. coniferarum* (sample voucher no./SVN: 9, 18, 22, 45, 57, 58, 68, 79, 81, 93, 116, 118, 119, 127, 128, and 150; Table S1), showing the same haplotype from Saudi Arabia.

\*\* It represents the average range of genetic distance value of 29 samples of *O. afrasiaticus* ((SVN: 4, 7, 33, 34, 39, 46, 49, 50, 66, 82, 85, 86, 89, 91, 94, 99, 102, 106, 109, 110, 112, 129, 157, 167, 170, 171, 173, and 176; Table S1 & accession no: DQ656437), showing the same haplotype from Israel, Pakistan, Saudi Arabia, and Yemen. The SVN: 39 was previously claimed as *O. pratensis* from Saudi Arabia [1].

\*\*\* It represents the average range of genetic distance value of nine samples of *O. tylus* ((SVN: 16, 51, 54, 61, 67, 98, 125, and 143; Table S1; accession no: MK640235), showing the same haplotype from India, Pakistan, and Saudi Arabia.

\*\*\*\* It represents the average genetic distance value of 10 samples of *O. washingtoniae* (sample voucher no./SVN: 2, 83, 84, 87, 88, 95, 124, 133, 168, and 175; Table S1), showing the same haplotype from Saudi Arabia.

**Table S3.** Genetic divergence (pairwise p-distance) based on nine COI partial sequences, either obtained in the present study or retrieved from GenBank, among six *Oligonychus* species (Acari: Prostigmata: Tetranychidae), collected/analyzed from Saudi Arabia and the USA.

| No. | <i>Oligonychus</i> species                     | 1     | 2             | 3             | 4     | 5     | 6     |
|-----|------------------------------------------------|-------|---------------|---------------|-------|-------|-------|
| 1   | <i>O. punicae</i> *                            | 0.000 |               |               |       |       |       |
| 2   | <i>O. afasiaticus</i> **                       | 0.165 | 0.000 – 0.029 |               |       |       |       |
| 3   | <i>O. tylus</i> ***                            | 0.162 | 0.142         | 0.000 – 0.003 |       |       |       |
| 4   | <i>O. washingtoniae</i> (SVN: 2, Saudi Arabia) | 0.147 | 0.106         | 0.127         | 0.000 |       |       |
| 5   | <i>O. pratensis</i> (SVN: 40, USA)             | 0.142 | 0.094         | 0.124         | 0.088 | 0.000 |       |
| 6   | <i>O. dactyloni</i> ****                       | 0.136 | 0.130         | 0.127         | 0.121 | 0.118 | 0.000 |

\* It represents the average genetic distance value of three samples of *O. punicae* (sample voucher no./SVN: 144 and 145; Table S1; accession no: MZ425483), showing the same haplotype from Saudi Arabia.

\*\* It represents the average range of genetic distance value of eight samples of *O. afasiaticus* ((SVN: 49, 50, 91, 102, 109, 110, and 112; Table S1; accession no: DQ656482), showing the same haplotype from Israel, Saudi Arabia, and Yemen.

\*\*\* It represents the average range of genetic distance value of four samples of *O. tylus* ((SVN: 54, 61, and 143; Table S1; accession no: KU323485), showing the same haplotype from India and Saudi Arabia

\*\*\*\* It represents the average genetic distance value of two samples of *O. dactyloni* (sample voucher no./SVN: 3 and 11; Table S1), showing the same haplotype from Saudi Arabia.

**Table S4.** Genetic divergence (pairwise p-distance) based on 38 ITS2 partial sequences, either obtained in the present study or retrieved from GenBank, showing variations among various populations of *Oligonychus afrasiaticus* and *O. tylus* (Acari: Prostigmata: Tetranychidae), collected/analyzed from Israel, India, Pakistan, Saudi Arabia, and Yemen.

| No. | <i>Oligonychus</i> species                           | 1     | 2     | 3     | 4     | 5     | 6     | 7     | 8     | 9     | 10    | 11    | 12    | 13    |
|-----|------------------------------------------------------|-------|-------|-------|-------|-------|-------|-------|-------|-------|-------|-------|-------|-------|
| 1   | <i>O. afrasiaticus</i> (H1)*                         | 0.000 |       |       |       |       |       |       |       |       |       |       |       |       |
| 2   | <i>O. afrasiaticus</i> (H2)**                        | 0.006 | 0.000 |       |       |       |       |       |       |       |       |       |       |       |
| 3   | <i>O. afrasiaticus</i> (H3)***                       | 0.004 | 0.006 | 0.000 |       |       |       |       |       |       |       |       |       |       |
| 4   | <i>O. afrasiaticus</i> (SVN: 34, Saudi Arabia) (H4)  | 0.006 | 0.004 | 0.004 | 0.000 |       |       |       |       |       |       |       |       |       |
| 5   | <i>O. afrasiaticus</i> (SVN: 171, Saudi Arabia) (H5) | 0.006 | 0.004 | 0.006 | 0.000 | 0.000 |       |       |       |       |       |       |       |       |
| 6   | <i>O. afrasiaticus</i> (H6)****                      | 0.008 | 0.002 | 0.008 | 0.002 | 0.002 | 0.000 |       |       |       |       |       |       |       |
| 7   | <i>O. afrasiaticus</i> (SVN: 66, Pakistan) (H7)      | 0.006 | 0.008 | 0.010 | 0.008 | 0.008 | 0.010 | 0.000 |       |       |       |       |       |       |
| 8   | <i>O. afrasiaticus</i> (SVN: 110, Saudi Arabia) (H8) | 0.006 | 0.004 | 0.010 | 0.004 | 0.004 | 0.002 | 0.008 | 0.000 |       |       |       |       |       |
| 9   | <i>O. afrasiaticus</i> (SVN: 173, Saudi Arabia) (H9) | 0.010 | 0.008 | 0.004 | 0.006 | 0.008 | 0.010 | 0.012 | 0.012 | 0.000 |       |       |       |       |
| 10  | <i>O. tylus</i> (MK640235, India) (H1)               | 0.188 | 0.188 | 0.189 | 0.164 | 0.192 | 0.190 | 0.190 | 0.190 | 0.195 | 0.000 |       |       |       |
| 11  | <i>O. tylus</i> (H2)*****                            | 0.188 | 0.188 | 0.189 | 0.164 | 0.192 | 0.190 | 0.190 | 0.190 | 0.195 | 0.004 | 0.000 |       |       |
| 12  | <i>O. tylus</i> (SVN: 143, Saudi Arabia) (H3)        | 0.190 | 0.190 | 0.191 | 0.166 | 0.194 | 0.192 | 0.192 | 0.192 | 0.197 | 0.008 | 0.004 | 0.000 |       |
| 13  | <i>O. tylus</i> (H4)*****                            | 0.188 | 0.188 | 0.189 | 0.164 | 0.192 | 0.190 | 0.190 | 0.190 | 0.195 | 0.004 | 0.000 | 0.004 | 0.000 |

\* It represents the ITS2 haplotype 1 of *O. afrasiaticus* that contains 10 samples (sample voucher no./SVN: 4, 7, 39, 82, 85, 86, 89, 106, and 170; Table S1; accession no: DQ 656437), collected from Israel and Saudi Arabia.

\*\* It represents the ITS2 haplotype 2 of *O. afrasiaticus* that contains eight samples (SVN: 33, 46, 49, 50, 91, 94, 102, and 176; Table S1), collected from Saudi Arabia and Yemen.

\*\*\* It represents the ITS2 haplotype 3 of *O. afrasiaticus* that contains three samples (SVN: 99, 157, and 167; Table S1), collected from Saudi Arabia.

\*\*\*\* It represents the ITS2 haplotype 6 of *O. afrasiaticus* that contains three samples (SVN: 109, 112, and 129; Table S1), collected from Saudi Arabia.

\*\*\*\*\* It represents the ITS2 haplotype 2 of *O. tylus* that contains five samples (SVN: 51, 54, 61, 67, and 98; Table S1), collected from Pakistan and Saudi Arabia.

\*\*\*\*\* It represents the ITS2 haplotype 4 of *O. tylus* that contains two samples (SVN: 16 and 125; Table S1), collected from Saudi Arabia.

- The yellow highlighted section represents nine different haplotypes of *O. afrasiaticus*.

- The blue highlighted section represents four different haplotypes of *O. tylus*.



**Table S5.** Genetic divergence (pairwise p-distance) based on 12 COI partial sequences, either obtained in the present study or retrieved from GenBank, showing variations among various populations of *Oligonychus afrasiaticus* and *O. tylus* (Acari: Prostigmata: Tetranychidae), collected/analyzed from Israel, India, Saudi Arabia, and Yemen.

| No. | <i>Oligonychus</i> species                              | 1     | 2     | 3     | 4     | 5     |
|-----|---------------------------------------------------------|-------|-------|-------|-------|-------|
| 1   | <i>O. afrasiaticus</i> (DQ656482, Israel) ( <b>H1</b> ) | 0.000 |       |       |       |       |
| 2   | <i>O. afrasiaticus</i> ( <b>H2</b> )*                   | 0.029 | 0.000 |       |       |       |
| 3   | <i>O. afrasiaticus</i> ( <b>H3</b> )**                  | 0.020 | 0.010 | 0.000 |       |       |
| 4   | <i>O. tylus</i> ( <b>H1</b> )***                        | 0.124 | 0.135 | 0.132 | 0.000 |       |
| 5   | <i>O. tylus</i> ( <b>H2</b> )****                       | 0.124 | 0.141 | 0.139 | 0.003 | 0.000 |

\* It represents the COI haplotype 2 of *O. afrasiaticus* that contains five samples (sample voucher no./SVN: 91, 102, 109, 110, and 112; Table S1), collected from Saudi Arabia.

\*\* It represents the COI haplotype 3 of *O. afrasiaticus* that contains two samples (SVN: 49 and 50; Table S1), collected from Yemen.

\*\*\* It represents the COI haplotype 1 of *O. tylus* that contains two samples (SVN: 54; Table S1; accession no: KU323485), collected from India and Saudi Arabia.

\*\*\*\* It represents the COI haplotype 2 of *O. tylus* that contains two samples (SVN: 61 and 143; Table S1), collected from Saudi Arabia.

- The yellow highlighted section represents three different haplotypes of *O. afrasiaticus*.

- The blue highlighted section represents two different haplotypes of *O. tylus*.

**Table S6.** Genetic divergence (pairwise p-distance) based on ITS2 sequences among 15 *Oligonychus* species (Acari: Prostigmata: Tetranychidae), either obtained in the present study or retrieved from GenBank, analyzed from India, Mexico, Saudi Arabia, and the USA.

| No. | <i>Oligonychus</i> species                     | 1     | 2     | 3     | 4     | 5     | 6     | 7     | 8     | 9     | 10    | 11    | 12    | 13    | 14    | 15    |
|-----|------------------------------------------------|-------|-------|-------|-------|-------|-------|-------|-------|-------|-------|-------|-------|-------|-------|-------|
| 1   | <i>O. punicae</i> (MZ435900, Saudi Arabia)     | 0.000 |       |       |       |       |       |       |       |       |       |       |       |       |       |       |
| 2   | <i>O. coniferarum</i> (SVN: 22, Saudi Arabia)  | 0.067 | 0.000 |       |       |       |       |       |       |       |       |       |       |       |       |       |
| 3   | <i>Oligonychus</i> sp. (KC352302, Mexico)*     | 0.104 | 0.081 | 0.000 |       |       |       |       |       |       |       |       |       |       |       |       |
| 4   | <i>O. perseae</i> (SVN. 53, Mexico)            | 0.296 | 0.289 | 0.326 | 0.000 |       |       |       |       |       |       |       |       |       |       |       |
| 5   | <i>O. afrasiaticus</i> (SVN: 91, Saudi Arabia) | 0.470 | 0.481 | 0.493 | 0.500 | 0.000 |       |       |       |       |       |       |       |       |       |       |
| 6   | <i>O. tylus</i> (SVN. 54, Saudi Arabia)        | 0.452 | 0.459 | 0.481 | 0.489 | 0.115 | 0.000 |       |       |       |       |       |       |       |       |       |
| 7   | <i>O. washingtoniae</i> (SVN: 2, Saudi Arabia) | 0.448 | 0.456 | 0.478 | 0.489 | 0.133 | 0.078 | 0.000 |       |       |       |       |       |       |       |       |
| 8   | <i>O. dactyloni</i> (SVN: 3, Saudi Arabia)     | 0.467 | 0.478 | 0.493 | 0.511 | 0.181 | 0.144 | 0.144 | 0.000 |       |       |       |       |       |       |       |
| 9   | <i>O. pratensis</i> (SVN: 40, USA)             | 0.470 | 0.478 | 0.496 | 0.485 | 0.141 | 0.089 | 0.115 | 0.148 | 0.000 |       |       |       |       |       |       |
| 10  | <i>O. indicus</i> (MN190324, India)            | 0.470 | 0.478 | 0.489 | 0.493 | 0.122 | 0.063 | 0.081 | 0.115 | 0.074 | 0.000 |       |       |       |       |       |
| 11  | <i>Oligonychus</i> sp. (MK386956, India)       | 0.470 | 0.463 | 0.481 | 0.507 | 0.152 | 0.096 | 0.133 | 0.141 | 0.126 | 0.081 | 0.000 |       |       |       |       |
| 12  | <i>Oligonychus</i> sp. (OL830813, India)       | 0.467 | 0.456 | 0.474 | 0.496 | 0.144 | 0.081 | 0.111 | 0.130 | 0.104 | 0.067 | 0.044 | 0.000 |       |       |       |
| 13  | <i>Oligonychus</i> sp. (MG677944, India)       | 0.456 | 0.463 | 0.485 | 0.493 | 0.115 | 0.056 | 0.070 | 0.141 | 0.078 | 0.059 | 0.104 | 0.081 | 0.000 |       |       |
| 14  | <i>Oligonychus</i> sp. (MG429138, India)       | 0.448 | 0.463 | 0.478 | 0.481 | 0.115 | 0.044 | 0.093 | 0.137 | 0.100 | 0.078 | 0.104 | 0.089 | 0.074 | 0.000 |       |
| 15  | <i>O. oryzae</i> (OP214345, India)             | 0.470 | 0.463 | 0.481 | 0.507 | 0.152 | 0.096 | 0.126 | 0.137 | 0.119 | 0.081 | 0.037 | 0.037 | 0.104 | 0.104 | 0.000 |

\* It represents a cryptic *Oligonychus* sp., previously claimed as *O. punicae* in Mexico [2].

**Table S7.** Genetic divergence (pairwise p-distance) based on COI sequences among 32 *Oligonychus* species (Acari: Prostigmata: Tetranychidae), either obtained in the present study or retrieved from GenBank.

| No. | <i>Oligonychus</i> species                     | 1     | 2     | 3     | 4     | 5     | 6     | 7     | 8     | 9     | 10    | 11    | 12    | 13    | 14    | 15    | 16    | 17    | 18    | 19    | 20    | 21    | 22    | 23    | 24    | 25    | 26    | 27    | 28    | 29    | 30    | 31    | 32    |
|-----|------------------------------------------------|-------|-------|-------|-------|-------|-------|-------|-------|-------|-------|-------|-------|-------|-------|-------|-------|-------|-------|-------|-------|-------|-------|-------|-------|-------|-------|-------|-------|-------|-------|-------|-------|
| 1   | <i>O. punicae</i> (MZ425483, Saudi Arabia)     | 0.000 |       |       |       |       |       |       |       |       |       |       |       |       |       |       |       |       |       |       |       |       |       |       |       |       |       |       |       |       |       |       |       |
| 2   | <i>Oligonychus</i> sp. (SVN: 52, Mexico)*      | 0.104 | 0.000 |       |       |       |       |       |       |       |       |       |       |       |       |       |       |       |       |       |       |       |       |       |       |       |       |       |       |       |       |       |       |
| 3   | <i>O. ununguis</i> (AB683664, Japan)           | 0.107 | 0.078 | 0.000 |       |       |       |       |       |       |       |       |       |       |       |       |       |       |       |       |       |       |       |       |       |       |       |       |       |       |       |       |       |
| 4   | <i>O. ununguis</i> (GU329963, China)           | 0.087 | 0.104 | 0.110 | 0.000 |       |       |       |       |       |       |       |       |       |       |       |       |       |       |       |       |       |       |       |       |       |       |       |       |       |       |       |       |
| 5   | <i>O. ununguis</i> (X80865, France)            | 0.097 | 0.091 | 0.065 | 0.068 | 0.000 |       |       |       |       |       |       |       |       |       |       |       |       |       |       |       |       |       |       |       |       |       |       |       |       |       |       |       |
| 6   | <i>O. gotohi</i> (AB683669, Japan)             | 0.074 | 0.074 | 0.084 | 0.087 | 0.087 | 0.000 |       |       |       |       |       |       |       |       |       |       |       |       |       |       |       |       |       |       |       |       |       |       |       |       |       |       |
| 7   | <i>O. castaneae</i> (AB683666, Japan)          | 0.084 | 0.084 | 0.061 | 0.074 | 0.055 | 0.074 | 0.000 |       |       |       |       |       |       |       |       |       |       |       |       |       |       |       |       |       |       |       |       |       |       |       |       |       |
| 8   | <i>O. pustulosus</i> (AB683655, Japan)         | 0.091 | 0.087 | 0.084 | 0.068 | 0.071 | 0.074 | 0.081 | 0.000 |       |       |       |       |       |       |       |       |       |       |       |       |       |       |       |       |       |       |       |       |       |       |       |       |
| 9   | <i>O. tsudomei</i> (AB683659, Japan)           | 0.091 | 0.087 | 0.097 | 0.084 | 0.091 | 0.087 | 0.084 | 0.084 | 0.000 |       |       |       |       |       |       |       |       |       |       |       |       |       |       |       |       |       |       |       |       |       |       |       |
| 10  | <i>O. ilicis</i> (AB683660, Japan)             | 0.094 | 0.087 | 0.084 | 0.087 | 0.078 | 0.078 | 0.087 | 0.081 | 0.094 | 0.000 |       |       |       |       |       |       |       |       |       |       |       |       |       |       |       |       |       |       |       |       |       |       |
| 11  | <i>O. amiensis</i> (AB683673, Japan)           | 0.107 | 0.100 | 0.091 | 0.094 | 0.091 | 0.091 | 0.081 | 0.081 | 0.087 | 0.078 | 0.000 |       |       |       |       |       |       |       |       |       |       |       |       |       |       |       |       |       |       |       |       |       |
| 12  | <i>O. hondoensis</i> (AB683658, Japan)         | 0.110 | 0.107 | 0.091 | 0.107 | 0.078 | 0.113 | 0.078 | 0.081 | 0.097 | 0.091 | 0.097 | 0.000 |       |       |       |       |       |       |       |       |       |       |       |       |       |       |       |       |       |       |       |       |
| 13  | <i>O. perditus</i> (AB683665, Japan)           | 0.120 | 0.081 | 0.071 | 0.113 | 0.087 | 0.074 | 0.084 | 0.094 | 0.091 | 0.097 | 0.107 | 0.113 | 0.000 |       |       |       |       |       |       |       |       |       |       |       |       |       |       |       |       |       |       |       |
| 14  | <i>O. clavatus</i> (AB683653, Japan)           | 0.084 | 0.100 | 0.097 | 0.065 | 0.074 | 0.074 | 0.068 | 0.081 | 0.081 | 0.068 | 0.087 | 0.087 | 0.097 | 0.000 |       |       |       |       |       |       |       |       |       |       |       |       |       |       |       |       |       |       |
| 15  | <i>O. neocastaneae</i> (LC341206, Japan)       | 0.087 | 0.100 | 0.104 | 0.032 | 0.081 | 0.084 | 0.065 | 0.091 | 0.087 | 0.091 | 0.110 | 0.110 | 0.113 | 0.071 | 0.000 |       |       |       |       |       |       |       |       |       |       |       |       |       |       |       |       |       |
| 16  | <i>O. karamatus</i> (AB683656, Japan)          | 0.097 | 0.081 | 0.091 | 0.074 | 0.074 | 0.081 | 0.068 | 0.078 | 0.084 | 0.068 | 0.081 | 0.087 | 0.084 | 0.071 | 0.071 | 0.000 |       |       |       |       |       |       |       |       |       |       |       |       |       |       |       |       |
| 17  | <i>O. camelliae</i> (AB683662, Japan)          | 0.113 | 0.078 | 0.087 | 0.097 | 0.084 | 0.084 | 0.084 | 0.078 | 0.087 | 0.078 | 0.094 | 0.094 | 0.087 | 0.087 | 0.107 | 0.087 | 0.000 |       |       |       |       |       |       |       |       |       |       |       |       |       |       |       |
| 18  | <i>O. platani</i> (X80866, France)             | 0.100 | 0.100 | 0.100 | 0.081 | 0.071 | 0.094 | 0.081 | 0.071 | 0.084 | 0.068 | 0.081 | 0.094 | 0.107 | 0.074 | 0.091 | 0.074 | 0.084 | 0.000 |       |       |       |       |       |       |       |       |       |       |       |       |       |       |
| 19  | <i>Oligonychus</i> sp. (MF462136, Australia)   | 0.094 | 0.074 | 0.071 | 0.087 | 0.078 | 0.074 | 0.065 | 0.068 | 0.087 | 0.078 | 0.091 | 0.091 | 0.081 | 0.091 | 0.087 | 0.074 | 0.081 | 0.091 | 0.000 |       |       |       |       |       |       |       |       |       |       |       |       |       |
| 20  | <i>O. perseae</i> (DQ656485, Israel)           | 0.129 | 0.117 | 0.097 | 0.142 | 0.107 | 0.117 | 0.107 | 0.107 | 0.133 | 0.117 | 0.123 | 0.129 | 0.123 | 0.133 | 0.146 | 0.123 | 0.123 | 0.136 | 0.107 | 0.000 |       |       |       |       |       |       |       |       |       |       |       |       |
| 21  | <i>O. biharensis</i> (OP363224, India)         | 0.149 | 0.149 | 0.159 | 0.123 | 0.120 | 0.149 | 0.133 | 0.133 | 0.139 | 0.139 | 0.155 | 0.142 | 0.159 | 0.123 | 0.133 | 0.120 | 0.155 | 0.123 | 0.139 | 0.159 | 0.000 |       |       |       |       |       |       |       |       |       |       |       |
| 22  | <i>O. indicus</i> (KC009700, India)            | 0.162 | 0.159 | 0.152 | 0.155 | 0.152 | 0.159 | 0.146 | 0.152 | 0.146 | 0.159 | 0.165 | 0.159 | 0.175 | 0.146 | 0.155 | 0.172 | 0.162 | 0.162 | 0.152 | 0.155 | 0.136 | 0.000 |       |       |       |       |       |       |       |       |       |       |
| 23  | <i>O. orthius</i> (AB683675, Japan)            | 0.149 | 0.126 | 0.117 | 0.129 | 0.123 | 0.117 | 0.126 | 0.091 | 0.123 | 0.113 | 0.129 | 0.117 | 0.139 | 0.126 | 0.136 | 0.123 | 0.120 | 0.117 | 0.113 | 0.142 | 0.123 | 0.104 | 0.000 |       |       |       |       |       |       |       |       |       |
| 24  | <i>O. rubicundus</i> (AB683681, Japan)         | 0.149 | 0.133 | 0.129 | 0.139 | 0.123 | 0.126 | 0.133 | 0.110 | 0.133 | 0.123 | 0.139 | 0.136 | 0.133 | 0.133 | 0.152 | 0.123 | 0.126 | 0.133 | 0.110 | 0.120 | 0.113 | 0.107 | 0.068 | 0.000 |       |       |       |       |       |       |       |       |
| 25  | <i>O. modestus</i> (AB683677, Japan)           | 0.149 | 0.139 | 0.146 | 0.152 | 0.149 | 0.126 | 0.139 | 0.120 | 0.133 | 0.139 | 0.129 | 0.146 | 0.149 | 0.142 | 0.159 | 0.133 | 0.136 | 0.142 | 0.107 | 0.165 | 0.142 | 0.113 | 0.097 | 0.100 | 0.000 |       |       |       |       |       |       |       |
| 26  | <i>O. grypus</i> (MW491838, India)             | 0.139 | 0.159 | 0.142 | 0.152 | 0.146 | 0.155 | 0.136 | 0.136 | 0.149 | 0.129 | 0.149 | 0.133 | 0.172 | 0.133 | 0.146 | 0.136 | 0.155 | 0.133 | 0.117 | 0.162 | 0.113 | 0.110 | 0.091 | 0.097 | 0.117 | 0.000 |       |       |       |       |       |       |
| 27  | <i>Oligonychus</i> sp. (KP180428, USA)         | 0.146 | 0.142 | 0.146 | 0.155 | 0.136 | 0.139 | 0.139 | 0.142 | 0.155 | 0.142 | 0.162 | 0.152 | 0.162 | 0.139 | 0.162 | 0.142 | 0.152 | 0.139 | 0.126 | 0.149 | 0.107 | 0.136 | 0.113 | 0.091 | 0.126 | 0.123 | 0.000 |       |       |       |       |       |
| 28  | <i>O. afrasiaticus</i> (SVN: 91, Saudi Arabia) | 0.165 | 0.146 | 0.149 | 0.168 | 0.155 | 0.155 | 0.146 | 0.149 | 0.146 | 0.149 | 0.149 | 0.146 | 0.159 | 0.155 | 0.168 | 0.146 | 0.146 | 0.136 | 0.142 | 0.155 | 0.123 | 0.123 | 0.100 | 0.094 | 0.117 | 0.136 | 0.133 | 0.000 |       |       |       |       |
| 29  | <i>O. tylus</i> (SVN: 54, Saudi Arabia)        | 0.165 | 0.159 | 0.155 | 0.152 | 0.139 | 0.162 | 0.165 | 0.139 | 0.155 | 0.165 | 0.181 | 0.159 | 0.146 | 0.142 | 0.162 | 0.172 | 0.162 | 0.159 | 0.168 | 0.172 | 0.139 | 0.117 | 0.110 | 0.120 | 0.136 | 0.142 | 0.139 | 0.142 | 0.000 |       |       |       |
| 30  | <i>O. washingtoniae</i> (SVN: 2, Saudi Arabia) | 0.152 | 0.129 | 0.142 | 0.155 | 0.152 | 0.139 | 0.146 | 0.129 | 0.146 | 0.136 | 0.162 | 0.146 | 0.159 | 0.152 | 0.149 | 0.146 | 0.152 | 0.146 | 0.126 | 0.152 | 0.126 | 0.104 | 0.084 | 0.074 | 0.107 | 0.100 | 0.091 | 0.104 | 0.133 | 0.000 |       |       |
| 31  | <i>O. pratensis</i> (SVN: 40, USA)             | 0.142 | 0.159 | 0.139 | 0.162 | 0.142 | 0.159 | 0.142 | 0.136 | 0.162 | 0.136 | 0.172 | 0.152 | 0.162 | 0.142 | 0.159 | 0.146 | 0.162 | 0.142 | 0.139 | 0.152 | 0.142 | 0.120 | 0.100 | 0.094 | 0.133 | 0.117 | 0.113 | 0.097 | 0.129 | 0.087 | 0.000 |       |
| 32  | <i>O. dactyloni</i> (SVN: 3, Saudi Arabia)     | 0.133 | 0.139 | 0.149 | 0.139 | 0.136 | 0.139 | 0.133 | 0.133 | 0.129 | 0.136 | 0.165 | 0.155 | 0.159 | 0.129 | 0.126 | 0.133 | 0.152 | 0.129 | 0.136 | 0.152 | 0.126 | 0.123 | 0.117 | 0.113 | 0.126 | 0.107 | 0.123 | 0.136 | 0.129 | 0.120 | 0.120 | 0.000 |

\* It represents a cryptic *Oligonychus* sp., previously claimed as *O. punicae* in Mexico [2].

- The yellow highlighted section represents three GenBank sequences of the claimed *O. ununguis* from Japan, China, and France that need to be revisited to confirm the taxonomic identity of their voucher specimens.

## References

1. Alatawi, F.J.; Kamran, M. Spider mites (Acari: Tetranychidae) of Saudi Arabia: two new species, new records and a key to all known species. *Journal of Natural History* **2018**, *52*, 429-455, doi:10.1080/00222933.2018.1434251.
2. Mushtaq, H.M.S.; Kamran, M.; Saleh, A.A.; Alatawi, F.J. Evidence for Reconsidering the Taxonomic Status of Closely Related *Oligonychus* Species in punicae Complex (Acari: Prostigmata: Tetranychidae). *Insects* **2023**, *14*, 1-16, doi:10.3390/insects14010003.
